# Supplementary material for: Exploring chemical diversity in Glycine max cultivars: A multivariate approach in the search for bioactive compounds against Spodoptera cosmioides
Source: PubMed Central journal article supplement (PMC9478465; doi:10.3389/fpls.2022.987782), 2022-09-02

## *Supplementary Material*

### **Exploring chemical diversity in *Glycine max* cultivars: a multivariate approach in the search for bioactive compounds against *Spodoptera cosmioides***

**Maria Clara Santana Aguiar<sup>1</sup>, Marcelo Mueller de Freitas<sup>2</sup>, Carlos Alessandro de Freitas<sup>2</sup>, Arlindo Leal Boiça Júnior<sup>2</sup>, Renato Lajarim Carneiro<sup>3</sup>, Maria Fátima das Graças Fernandes da Silva<sup>1</sup>, João Batista Fernandes<sup>1</sup>, Moacir Rossi Forim<sup>1\*</sup>**

<sup>1</sup>Laboratory of Natural Products, Department of Chemistry, Universidade Federal de São Carlos, São Carlos, Brazil

<sup>2</sup>Laboratory of Plant Resistance to Insects, Department of Agricultural Sciences, Universidade do Estado de São Paulo, Jaboticabal, Brazil

<sup>3</sup>Laboratory of Applied Chemometrics, Department of Chemistry, Universidade Federal de São Carlos, São Carlos, Brazil

**\* Correspondence:**

Corresponding Author  
*mrforim@ufscar.br*

**Supplementary Table 1.** Matrix representation of the factorial design and the response obtained for solid-liquid extraction.

| Test<br>n° | Codel levels |    |    |    | Response variables     |                                                   |            | Dg   |             |
|------------|--------------|----|----|----|------------------------|---------------------------------------------------|------------|------|-------------|
|            | A            | B  | C  | D  | Number of<br>compounds | $\Sigma(\text{peak area/internal standard area})$ |            |      |             |
|            |              |    |    |    |                        | (1-5 min)                                         | (5-10 min) |      | (10-15 min) |
| 1          | 1            | 1  | 1  | 1  | 52                     | 11.4                                              | 44.1       | 15.5 | 0.93        |
| 2          | -1           | 1  | 1  | 1  | 41                     | 10.4                                              | 37.4       | 10.2 | 0.45        |
| 3          | 1            | -1 | 1  | 1  | 41                     | 11.4                                              | 37.6       | 10.3 | 0.52        |
| 4          | -1           | -1 | 1  | 1  | 41                     | 11.8                                              | 37.4       | 10.7 | 0.56        |
| 5          | 1            | 1  | -1 | 1  | 39                     | 12.3                                              | 43.5       | 10.0 | 0.64        |
| 6          | -1           | 1  | -1 | 1  | 40                     | 9.8                                               | 32.1       | 7.5  | 0.24        |
| 7          | 1            | -1 | -1 | 1  | 45                     | 10.6                                              | 34.8       | 8.6  | 0.44        |
| 8          | -1           | -1 | -1 | 1  | 48                     | 10.1                                              | 37.8       | 10.1 | 0.54        |
| 9          | 1            | 1  | 1  | -1 | 39                     | 11.5                                              | 43.1       | 11.2 | 0.61        |
| 10         | -1           | 1  | 1  | -1 | 37                     | 10.3                                              | 29.8       | 8.1  | 0.20        |
| 11         | 1            | -1 | 1  | -1 | 43                     | 11.4                                              | 31.9       | 8.4  | 0.41        |
| 12         | -1           | -1 | 1  | -1 | 35                     | 11.3                                              | 29.0       | 7.2  | 0.21        |
| 13         | 1            | 1  | -1 | -1 | 41                     | 12.1                                              | 41.5       | 10.8 | 0.65        |
| 14         | -1           | 1  | -1 | -1 | 44                     | 11.4                                              | 29.3       | 8.0  | 0.37        |
| 15         | 1            | -1 | -1 | -1 | 45                     | 12.5                                              | 30.0       | 8.9  | 0.49        |
| 16         | -1           | -1 | -1 | -1 | 43                     | 10.8                                              | 28.7       | 6.2  | 0.26        |
| 17         | 0            | 0  | 0  | 0  | 49                     | 10.5                                              | 29.3       | 10.5 | 0.45        |
| 18         | 0            | 0  | 0  | 0  | 48                     | 10.7                                              | 37.6       | 9.1  | 0.55        |
| 19         | 0            | 0  | 0  | 0  | 48                     | 8.7                                               | 41.1       | 10.7 | 0.51        |

A: temperature (25, 50 e 70°C); B: extractor mixture - methanol solution (50:50, 30:70 and 10:90% v v<sup>-1</sup>); C: time (5, 20 e 35 min); D: number of extractions (1, 2 and 3); -1: lower level; + 1: higher level; Dg: Global desirability.

**Supplementary Table 2.** Matrix representation of the factorial design and the response obtained for solid-liquid extraction using ultrasound bath.

| Test<br>n° | Codel levels |    |    | Number of<br>compounds | Response variables                                |            |             | Dg   |
|------------|--------------|----|----|------------------------|---------------------------------------------------|------------|-------------|------|
|            | A            | B  | C  |                        | $\Sigma(\text{peak area/internal standard area})$ |            |             |      |
|            |              |    |    |                        | (1-5 min)                                         | (5-10 min) | (10-15 min) |      |
| 1          | 1            | 1  | 1  | 39                     | 7.29                                              | 29.6       | 7.71        | 0.53 |
| 2          | -1           | 1  | 1  | 39                     | 10.1                                              | 39.1       | 10.7        | 0.83 |
| 3          | 1            | -1 | 1  | 45                     | 10.1                                              | 25.9       | 9.04        | 0.71 |
| 4          | -1           | -1 | 1  | 44                     | 12.4                                              | 40.9       | 7.18        | 0.89 |
| 5          | 1            | 1  | -1 | 31                     | 7.62                                              | 24.4       | 6.07        | 0.37 |
| 6          | -1           | 1  | -1 | 19                     | 6.49                                              | 14.2       | 2.29        | 0.00 |
| 7          | 1            | -1 | -1 | 41                     | 10.2                                              | 28.2       | 5.88        | 0.61 |
| 8          | -1           | -1 | -1 | 39                     | 10.1                                              | 28.7       | 5.15        | 0.57 |
| 9          | 0            | 0  | 0  | 39                     | 9.70                                              | 31.07      | 5.39        | 0.58 |
| 10         | 0            | 0  | 0  | 38                     | 9.53                                              | 30.23      | 5.22        | 0.55 |
| 11         | 0            | 0  | 0  | 39                     | 9.27                                              | 32.53      | 5.53        | 0.58 |

A: time (5, 20 and 35 min); B: extractor mixture - methanol solution (50:50, 30:70 and 10:90% v v<sup>-1</sup>); C: number of extractions (1, 2 and 3); -1: lower level; + 1: higher level; Dg: Global desirability.

**Supplementary Figure 1.** Total ion chromatograms of nonvolatile compounds from *Glycine max* leaves using the optimized conditions of solid-liquid extraction and solid-liquid extraction assisted by an ultrasound bath.

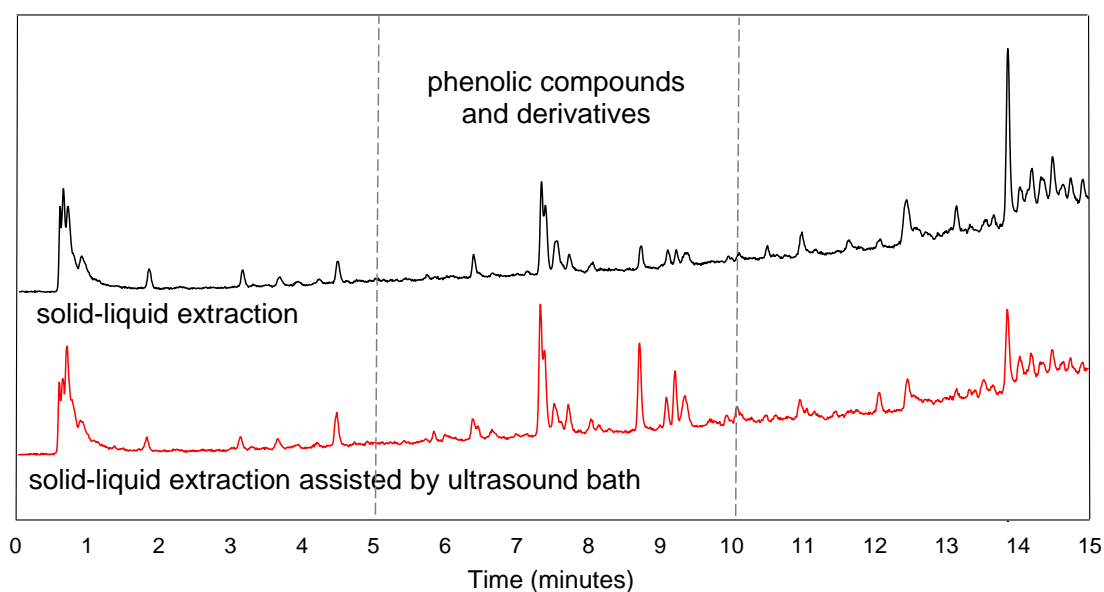

**Supplementary Figure 2.** Contour curves for solid-liquid extraction (a) and solid-liquid extraction assisted by ultrasound bath (b).

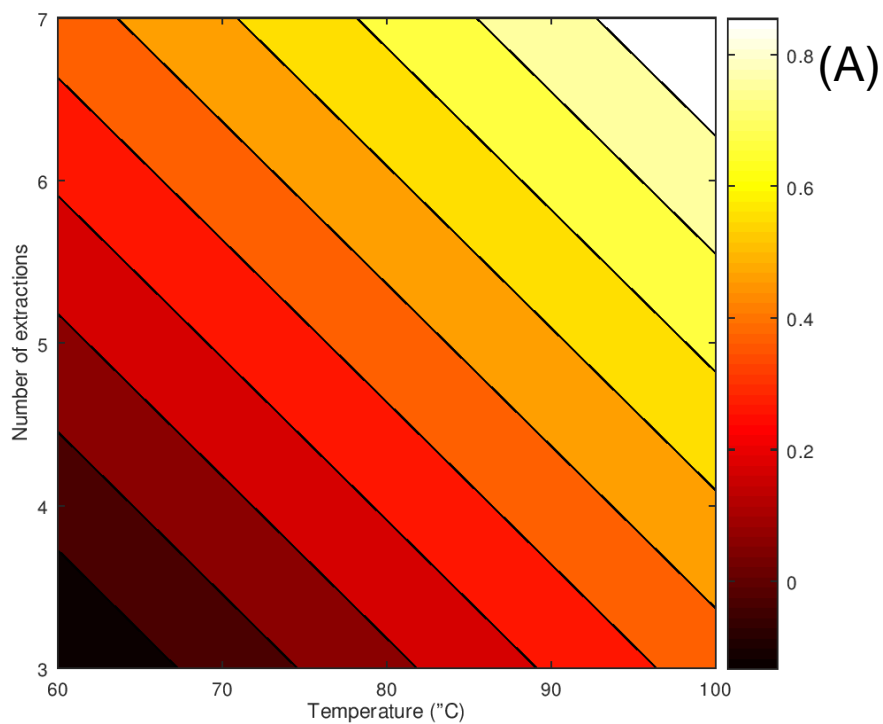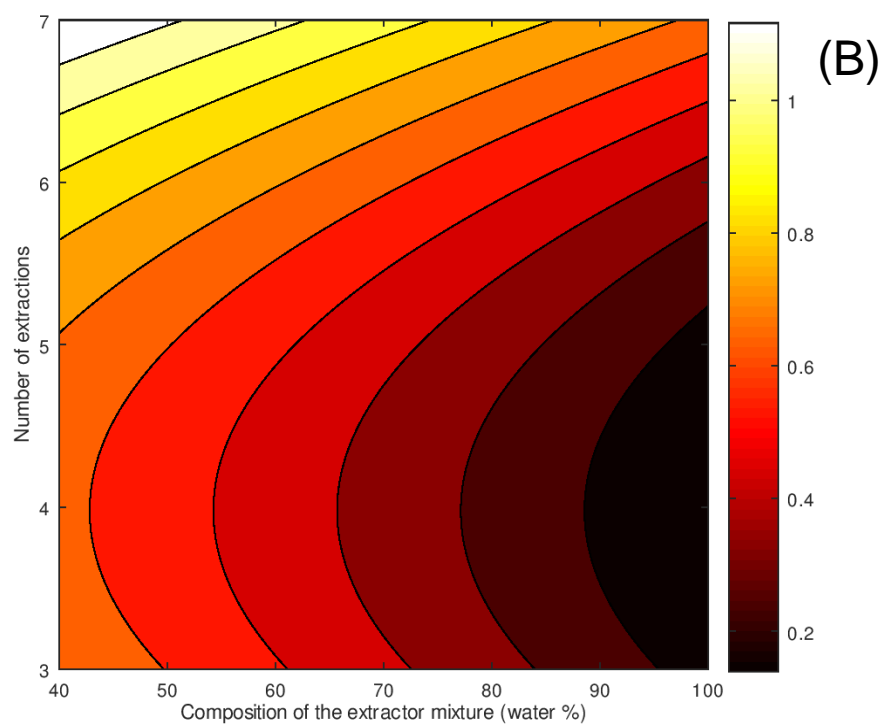

**Supplementary Table 3.** Matrix representation of the factorial planning and the response obtained for static headspace extraction.

| Test n° | Codel levels |    |    | Response variables  |                               |            | Dg          |      |
|---------|--------------|----|----|---------------------|-------------------------------|------------|-------------|------|
|         | A            | B  | C  | Number of compounds | $\Sigma$ (Relative abundance) |            |             |      |
|         |              |    |    |                     | (1-7 min)                     | (7-15 min) | (15-30 min) |      |
| 1       | -1           | -1 | -1 | 28                  | 75.0                          | 12.3       | 12.8        | 0.34 |
| 2       | 1            | -1 | -1 | 20                  | 80.7                          | 16.7       | 2.6         | 0.28 |
| 3       | -1           | 1  | -1 | 52                  | 58.2                          | 37.3       | 4.5         | 0.56 |
| 4       | 1            | 1  | -1 | 48                  | 82.3                          | 22.7       | 5.0         | 0.54 |
| 5       | -1           | -1 | 1  | 18                  | 84.1                          | 19.1       | 18.7        | 0.39 |
| 6       | 1            | -1 | 1  | 20                  | 71.5                          | 22.6       | 5.9         | 0.30 |
| 7       | -1           | 1  | 1  | 40                  | 67.3                          | 40.4       | 6.3         | 0.55 |
| 8       | 1            | 1  | 1  | 53                  | 76.8                          | 48.6       | 8.6         | 0.75 |
| 9       | 0            | 0  | 0  | 31                  | 56.0                          | 27.6       | 9.4         | 0.36 |
| 10      | 0            | 0  | 0  | 31                  | 62.1                          | 28.9       | 9.0         | 0.39 |
| 11      | 0            | 0  | 0  | 32                  | 62.1                          | 31.7       | 7.2         | 0.41 |

A: time (5, 15 e 25); B: temperature (40, 80 e 120°C); C: saturation with glycerol (0, 0.5 e 1.0 g); -1: lower level; + 1: higher level; Dg: Global desirability.

**Supplementary Figure 3.** Total ion chromatogram of volatile compounds from *Glycine max* leaves using the optimized conditions of static headspace extraction.

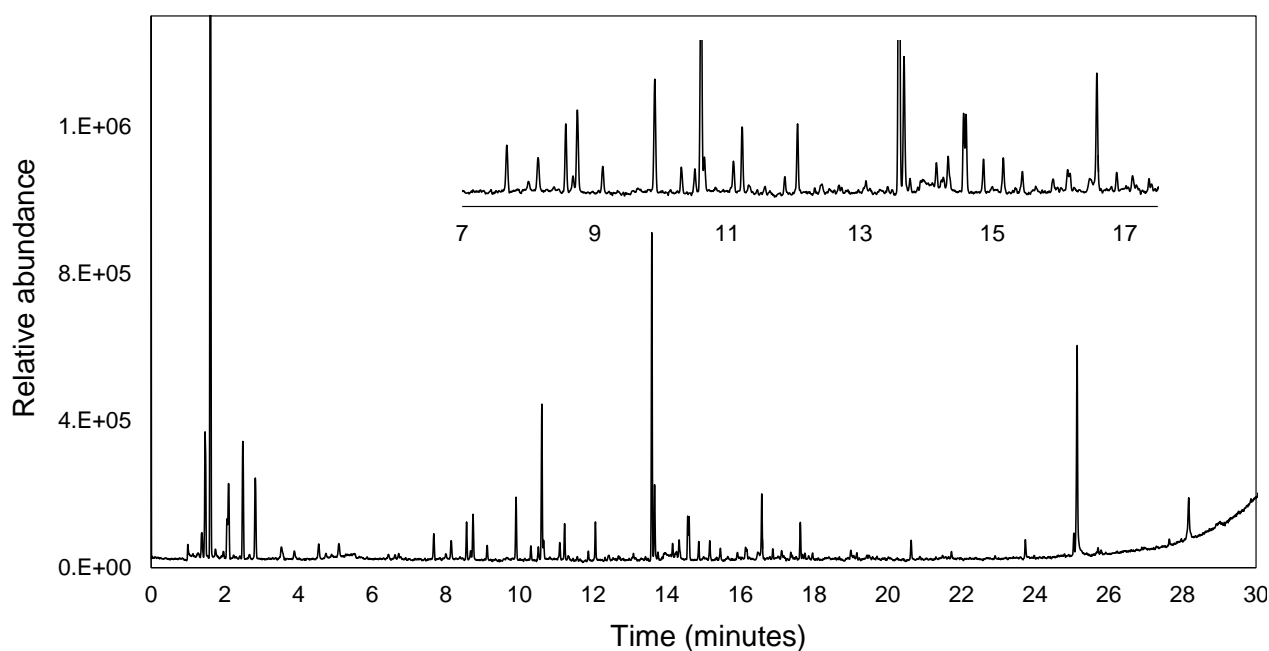

**Supplementary Figure 4.** Comparison of the total ion chromatograms of nonvolatile compounds from leaves of *Glycine max* of ten cultivars using the optimized conditions of solid-liquid extraction assisted by ultrasound bath.

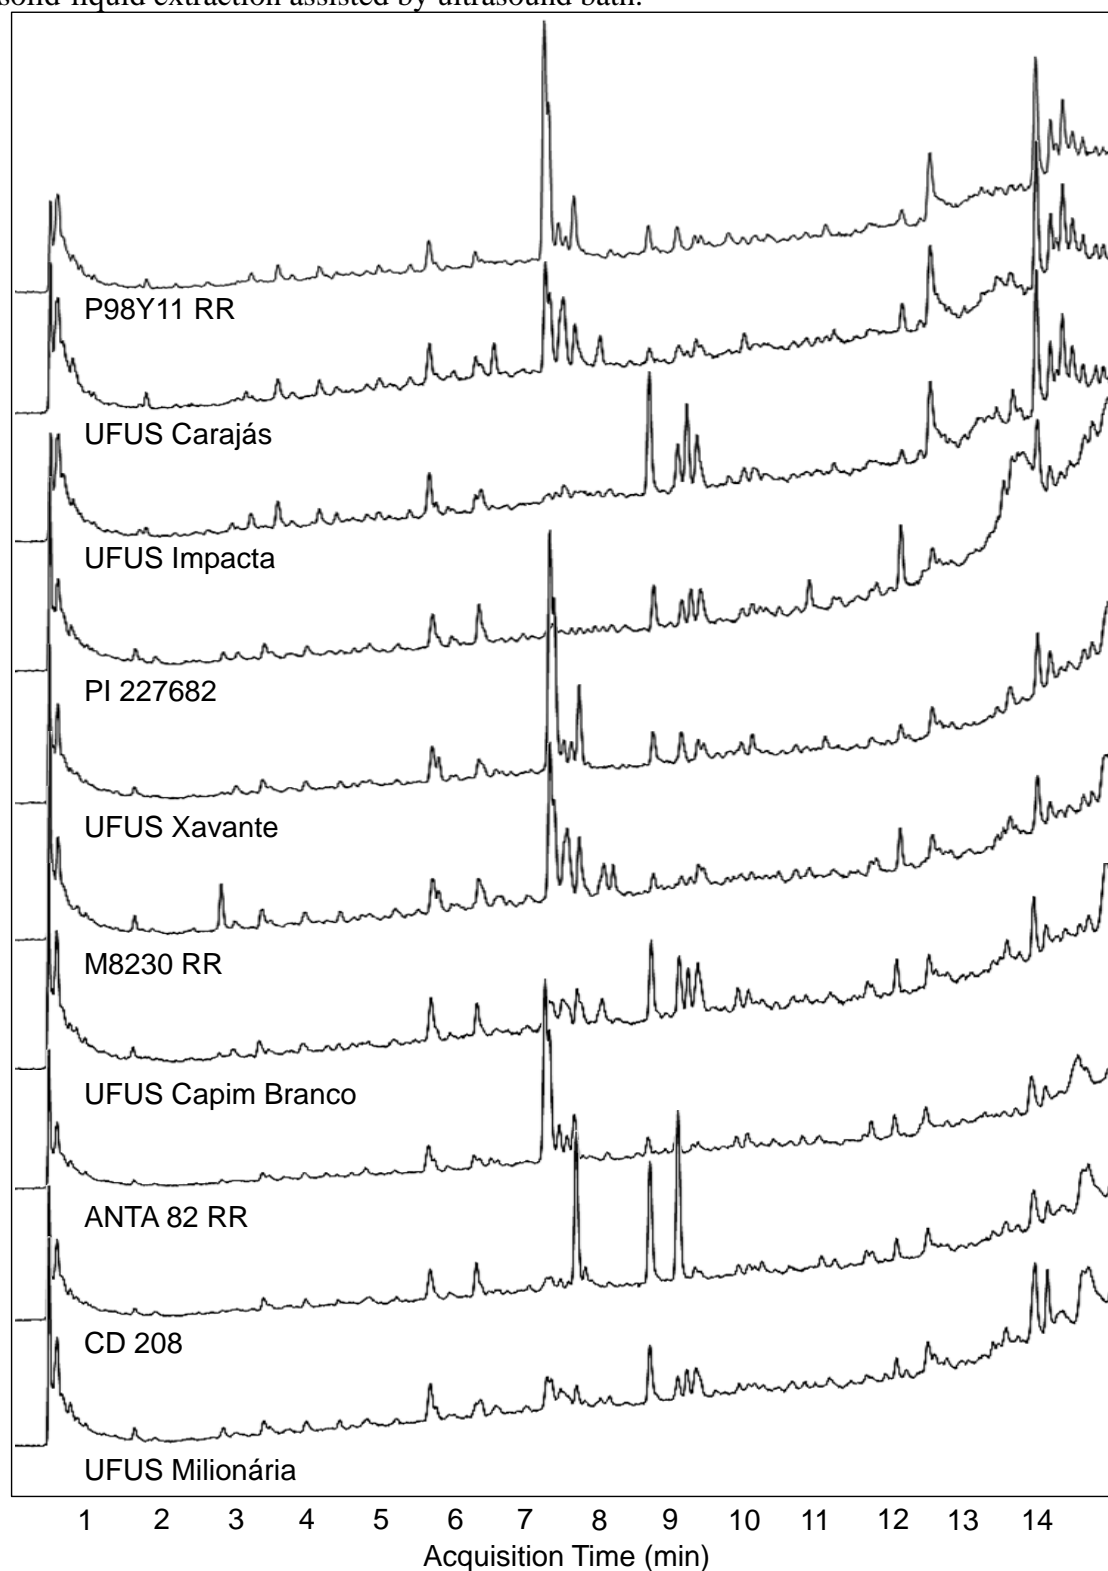

**Supplementary Figure 5.** Comparison of the total ion chromatograms of volatile compounds from leaves of *G. max* of ten cultivars using the optimized conditions of static headspace extraction.

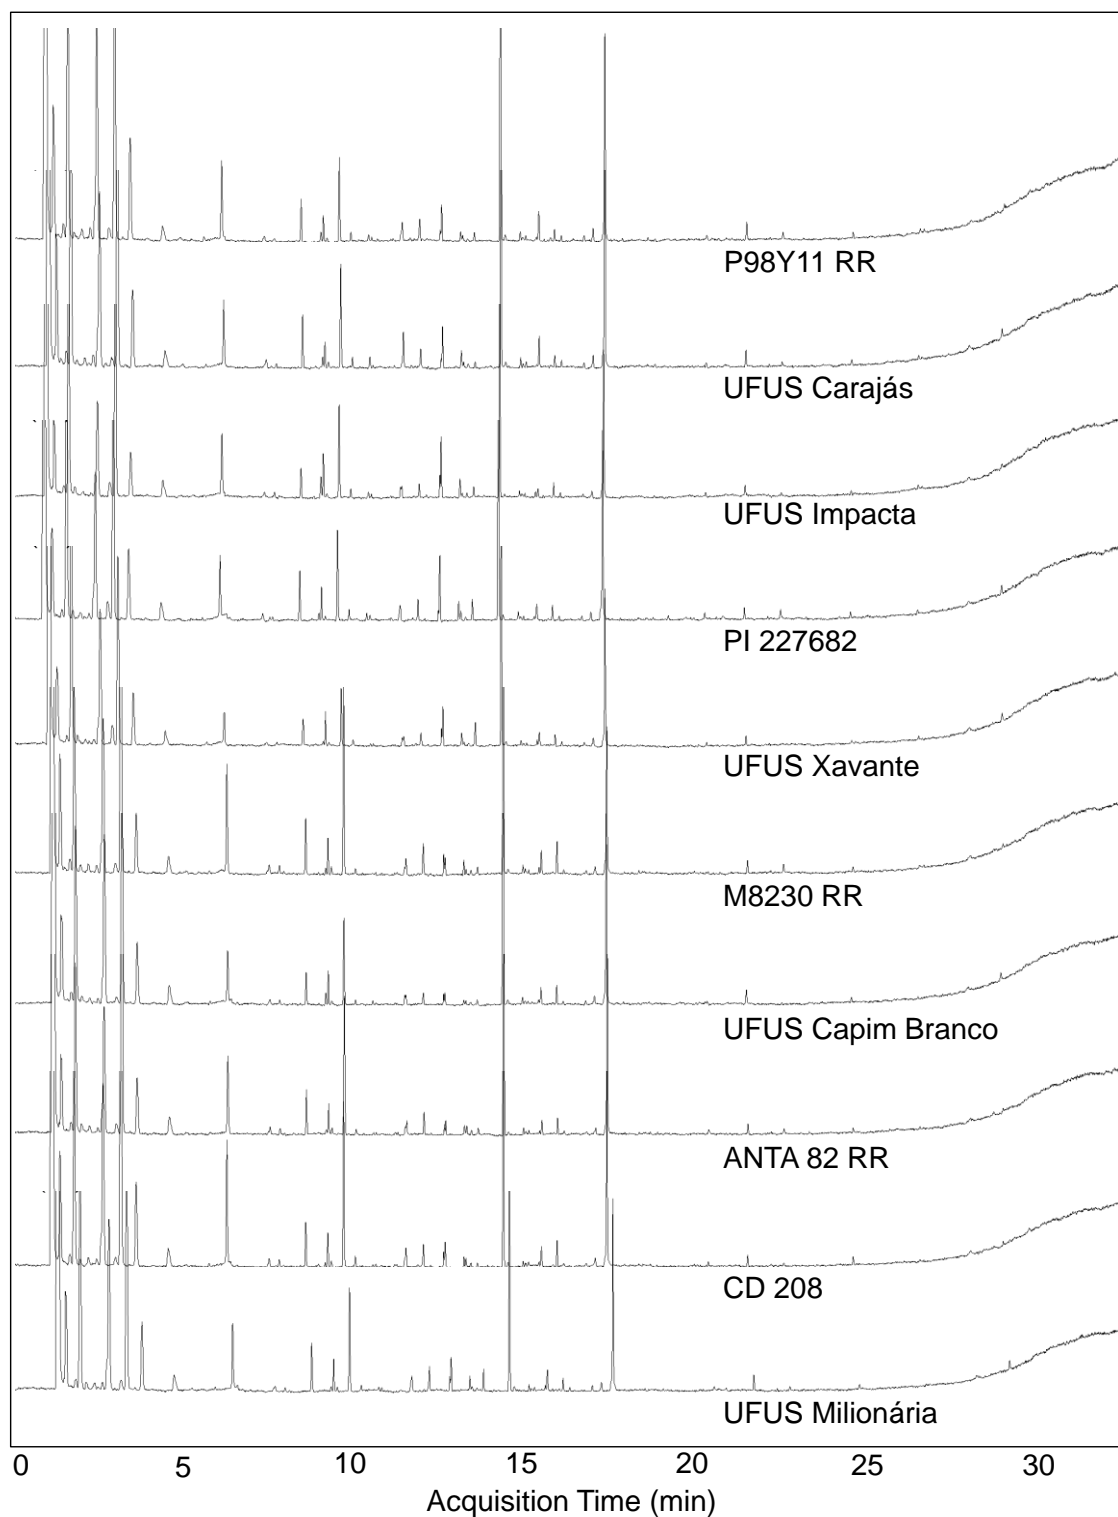

**Supplementary Table 4.** Nonvolatile compounds were detected in *Glycine max* leaves extract (Cavaliere et al., 2007; Ho et al., 2002; Jeon et al., 2012; Klejdus et al., 2005; Salerno et al., 2017; Song et al., 2014; Zanzarin et al., 2019).

| Compound identification         | Main fragments                                                                      | Detected precursor ions |                     |                                   | Molecular formula | Error (ppm)                                                  |      |
|---------------------------------|-------------------------------------------------------------------------------------|-------------------------|---------------------|-----------------------------------|-------------------|--------------------------------------------------------------|------|
|                                 |                                                                                     | (M+H) <sup>+</sup>      | (M+Na) <sup>+</sup> | (M+NH <sub>4</sub> ) <sup>+</sup> |                   |                                                              |      |
| Caffeine<br>(Internal Standard) | 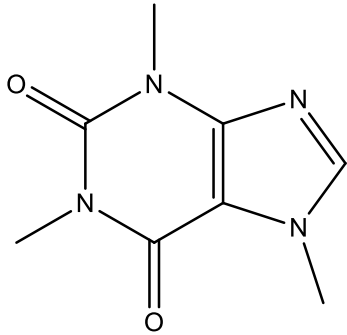   | 138, 123,<br>110        | 195.0873            | 217.0645                          | -                 | C <sub>8</sub> H <sub>10</sub> N <sub>4</sub> O <sub>2</sub> | 1.41 |
| Indole                          |    | 117                     | 118.0646            | 140.0497                          | -                 | C <sub>8</sub> H <sub>7</sub> N                              | 3.29 |
| Trigonelline                    |  | 136, 123,<br>110        | 138.0548            | -                                 | -                 | C <sub>7</sub> H <sub>7</sub> NO <sub>2</sub>                | 0.57 |



|                              |                                                                                    |          |          |          |          |                                                |       |
|------------------------------|------------------------------------------------------------------------------------|----------|----------|----------|----------|------------------------------------------------|-------|
| Tuberonic acid glucoside     | 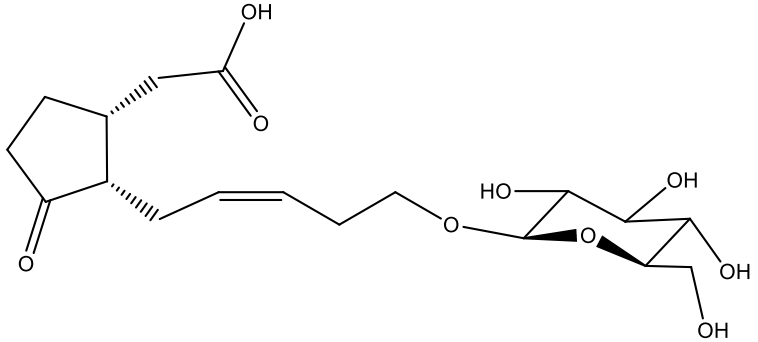 | 367, 209 | -        | 411.1619 | -        | C <sub>18</sub> H <sub>28</sub> O <sub>9</sub> | 2.00  |
| Tetradecanoic acid           |   | 229, 209 | -        | -        | 246.2427 | C <sub>14</sub> H <sub>28</sub> O <sub>2</sub> | -0.11 |
| 16-Hydroxy hexadecanoic acid |   | 274, 258 | -        | -        | 290.2686 | C <sub>16</sub> H <sub>32</sub> O <sub>3</sub> | 1.26  |
| Palmitic amide               |  | 212      | 256.2634 | -        | -        | C <sub>16</sub> H <sub>33</sub> NO             | 0.21  |

Luteolin

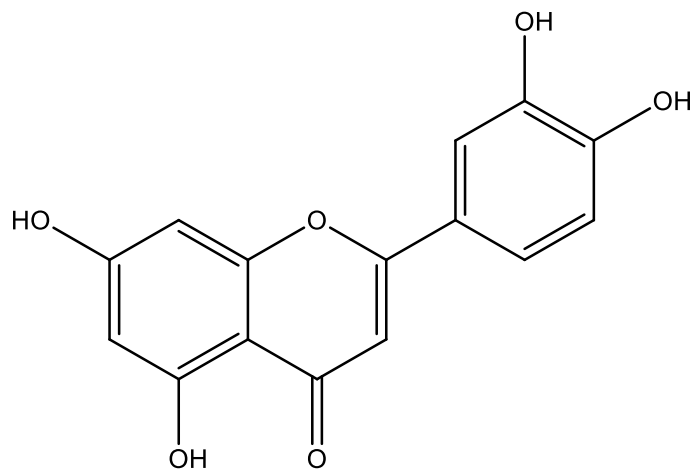133, 128,  
107

287.0547

-

-

 $C_{15}H_{10}O_6$ 

0.88

3-*O*-methylquercetin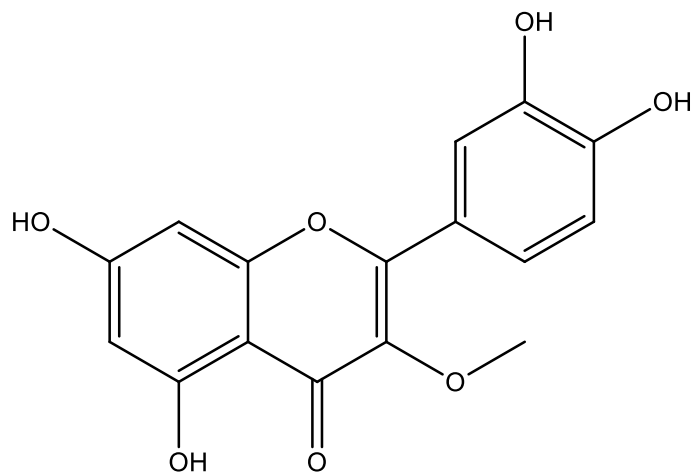302, 274,  
229

317.0646

-

-

 $C_{15}H_{10}O_7$ 

3.12

Baicalein

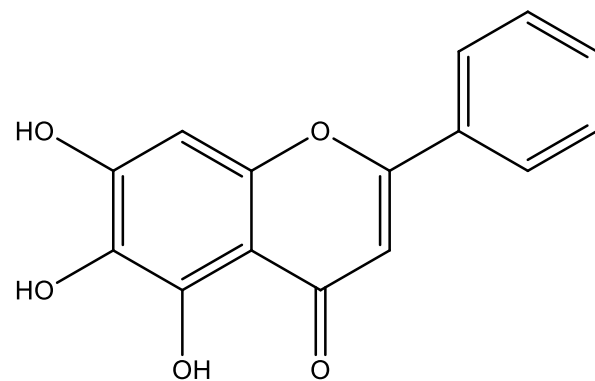141, 123,  
115, 105

271.0597

-

-

 $C_{15}H_{10}O_5$ 

1.11

Apigenin

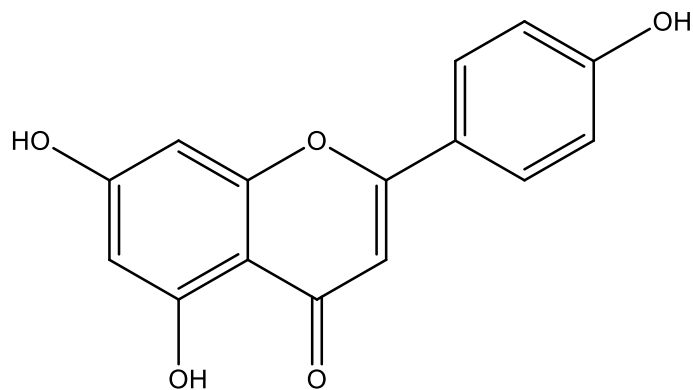197, 187,  
153, 131,  
115, 109

271.0598

-

-

 $C_{15}H_{10}O_5$ 

0.99

Mosloflavone

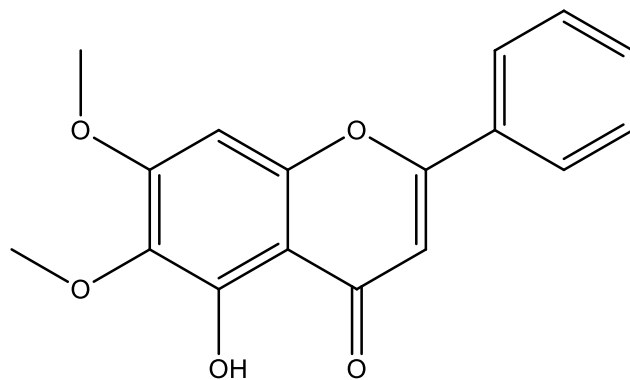

284

299.0913

321.0727

-

 $C_{17}H_{14}O_5$ 

0.64

Naringenin

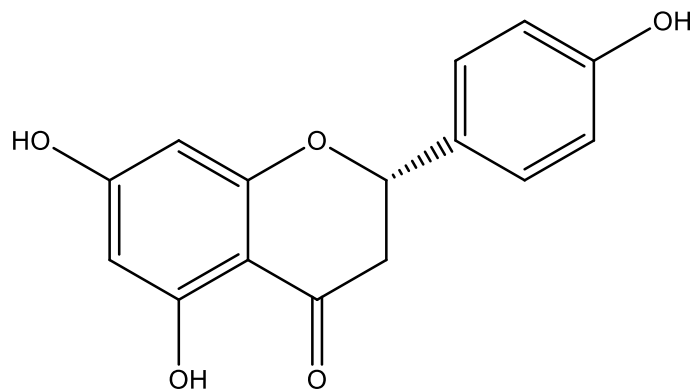

153, 147

273.0752

-

-

 $C_{15}H_{12}O_5$ 

1.51

Chrysin

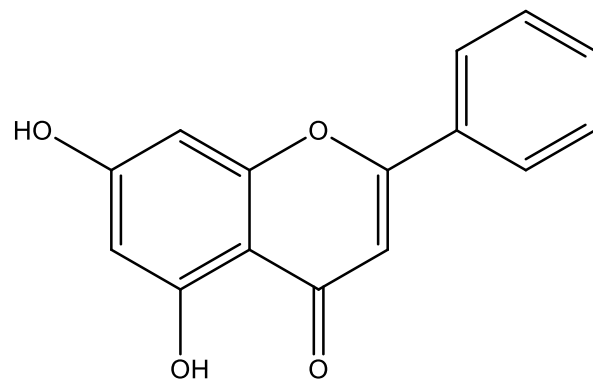

115, 103

255.0651

-

-

 $C_{15}H_{10}O_4$ 

0.3

Glycitein

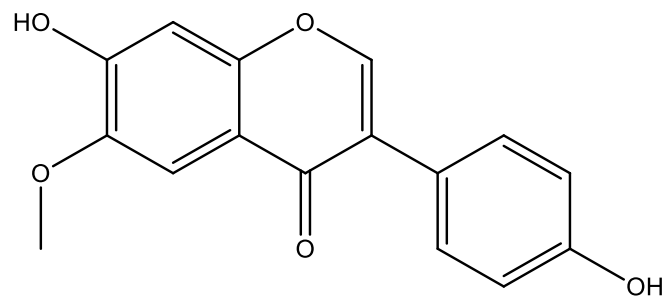270, 242,  
128, 115,  
107

285.0754

-

-

 $C_{16}H_{12}O_5$ 

0.84

|                               |                                                                                      |                                            |          |           |   |                                                 |       |
|-------------------------------|--------------------------------------------------------------------------------------|--------------------------------------------|----------|-----------|---|-------------------------------------------------|-------|
| 6"- <i>O</i> -Malonylgenistin | 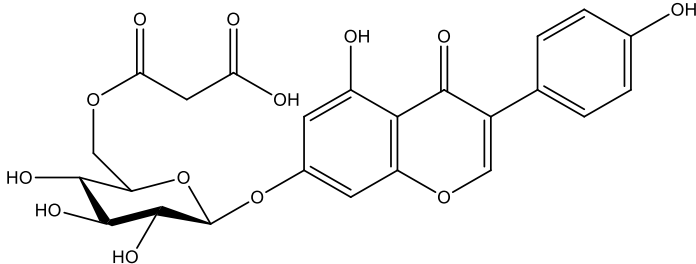   | 271                                        | 518.1053 | 541.09410 | - | C <sub>24</sub> H <sub>22</sub> O <sub>13</sub> | 1.75  |
| Daidzein                      |    | 227, 199,<br>152, 128,<br>115, 107,<br>103 | 255.0655 | -         | - | C <sub>15</sub> H <sub>10</sub> O <sub>4</sub>  | -0.27 |
| Biochanin A                   |   | 270, 253,<br>213                           | 285.0751 | -         | - | C <sub>16</sub> H <sub>12</sub> O <sub>5</sub>  | 1.96  |
| Formononetin                  |  | 253, 226,<br>213                           | -        | 269.0805  | - | C <sub>16</sub> H <sub>12</sub> O <sub>4</sub>  | 1.57  |

---

Genistein

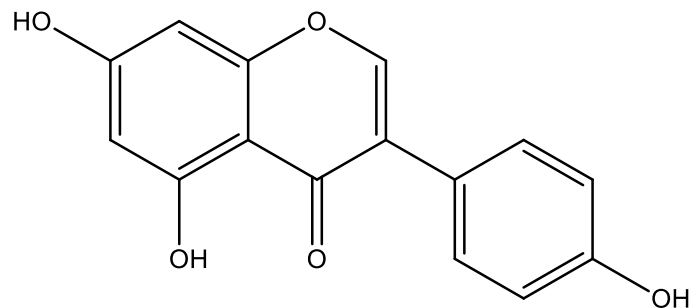

243, 159,  
152, 115,  
107

271.0600

-

-

C<sub>15</sub>H<sub>10</sub>O<sub>5</sub>

0.49

---

Afrormosin

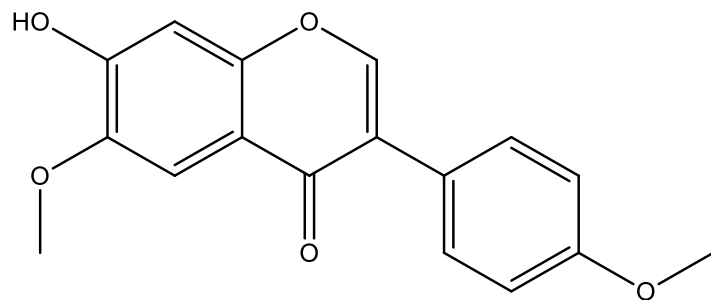

284, 141,  
128, 121,  
117

299.0912

321.0731

-

C<sub>17</sub>H<sub>14</sub>O<sub>5</sub>

-0.17

---

Methyl jasmonate

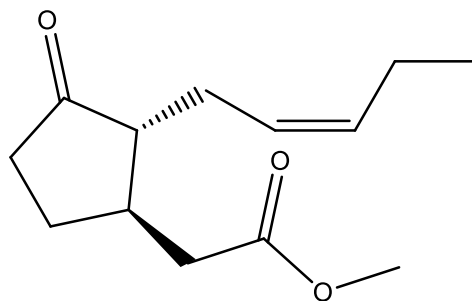

147, 133,  
109

225.1483

-

-

C<sub>13</sub>H<sub>20</sub>O<sub>3</sub>

2.13

---

Quercetin-3-O-glucosylrutinoside

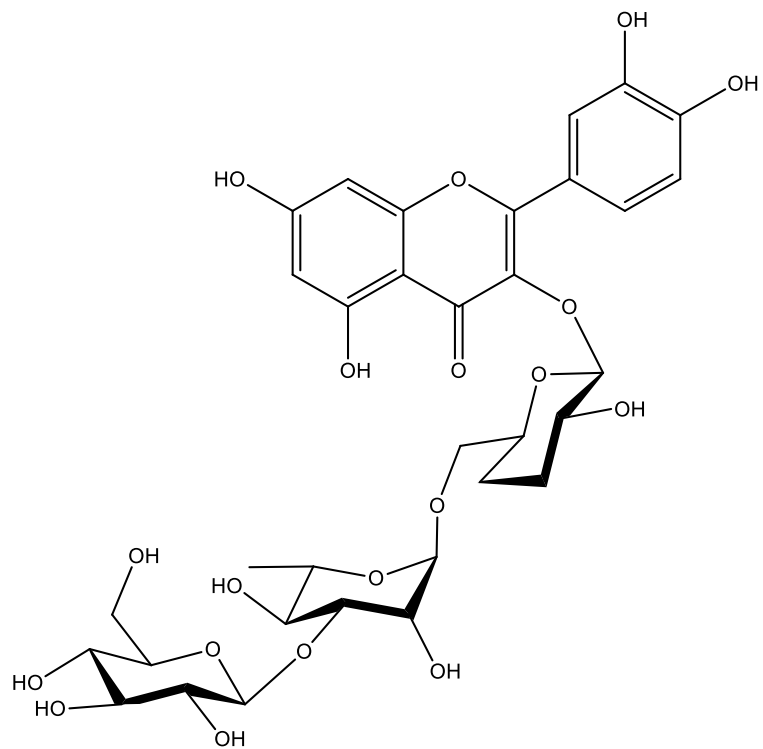

465, 347,  
303, 279,  
153, 117,  
107

- 795.1948 - C<sub>33</sub>H<sub>40</sub>O<sub>21</sub> 0.86

Methyl salicylate-*O*-  
[rhamnosyl-(1→6)-  
glucoside]

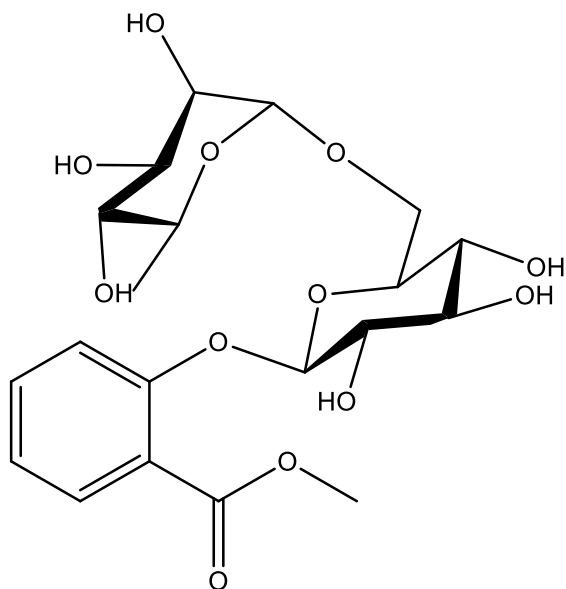

- - 483.147 - C<sub>20</sub>H<sub>28</sub>O<sub>12</sub> 0.69

Kaempferol-3-*O*-β-D-  
glucopyranosyl(1→2)-*O*-  
[α-L-  
rhamnopyranosyl(1→6)]-  
β-D-galactopyranoside

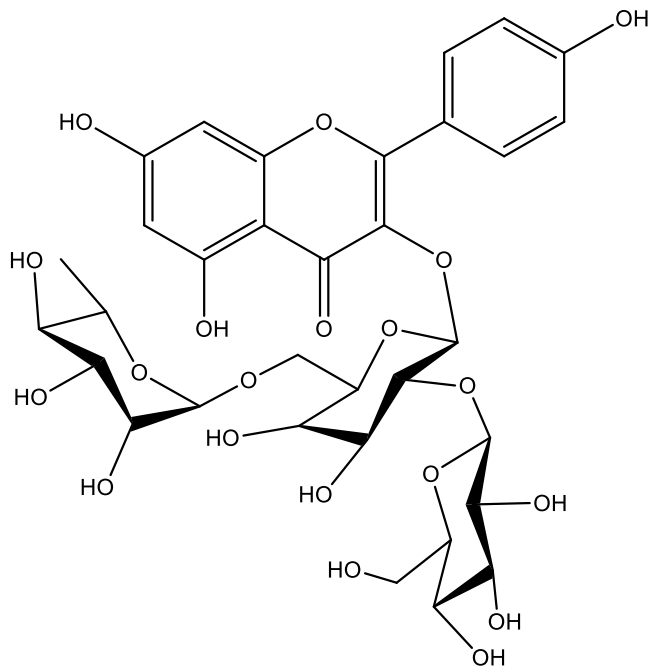

495, 449,  
287 756.2107 779.2000 - C<sub>33</sub>H<sub>40</sub>O<sub>20</sub> 0.91



Kaempferol-3-O-β-D-glucopyranosyl(1→2)-O-[α-L-rhamnopyranosyl(1→6)]-β-D-glucopyranoside

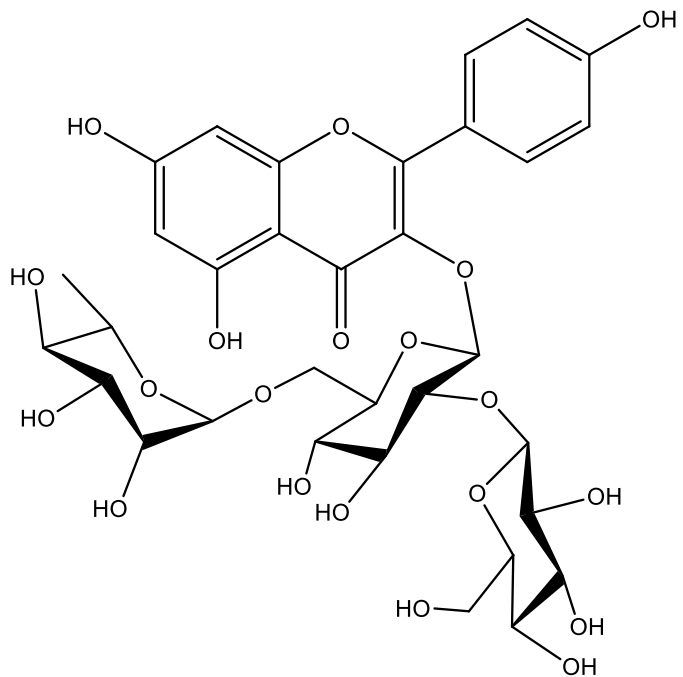

497, 449,  
287

756.2103

779.1996

-

C<sub>33</sub>H<sub>40</sub>O<sub>20</sub>

1.31

Kaempferol-3-O-digalactopyranoside

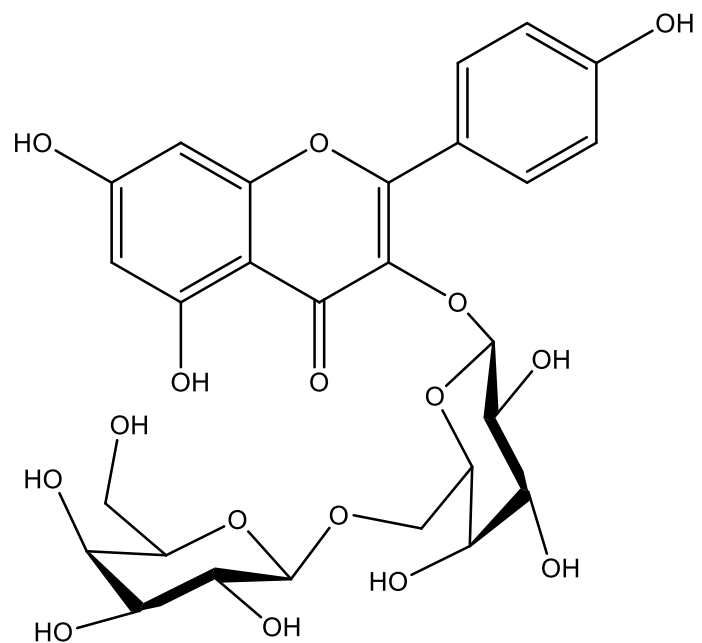

287

610.1522

633.1413

-

$C_{27}H_{30}O_{16}$

2.51

Kaempferol-3-O-diglucopyranoside

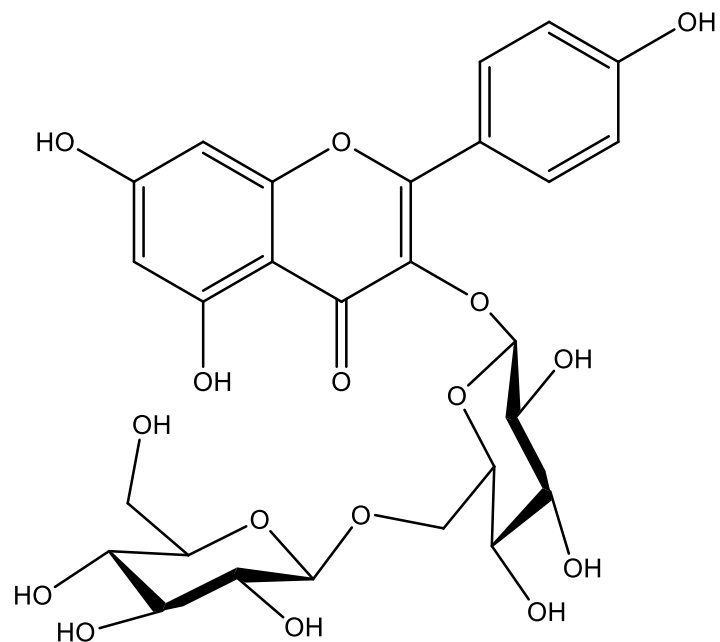

287

610.1525

633.1422

-

$C_{27}H_{30}O_{16}$

1.32

---

Kaempferol-3-O-β-D-(2,6-di-O-α-L-rhamnopyranosyl)galactopyranoside

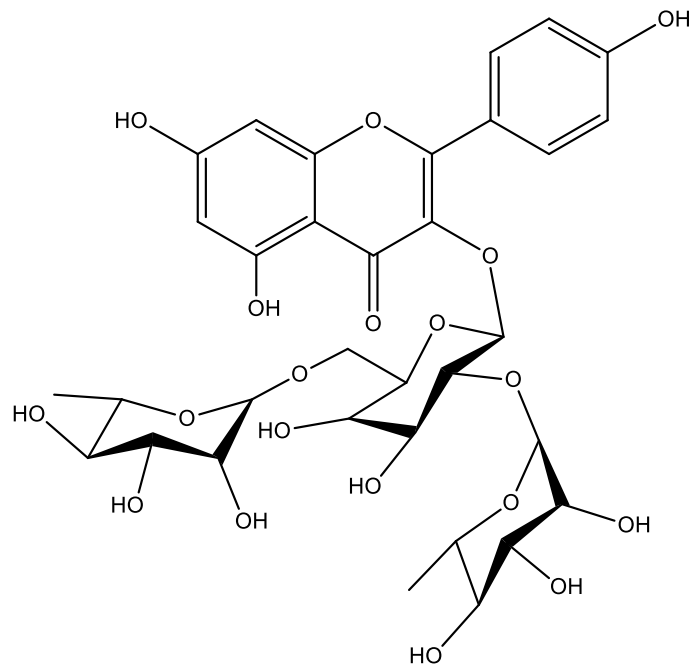

287

740.2150

763.2040

-

C<sub>33</sub>H<sub>40</sub>O<sub>19</sub>

2.06

---

Kaempferol-3-O- $\alpha$ -L-rhamnopyranosyl (1 $\rightarrow$ 6)- $\beta$ -D-galactopyronoside

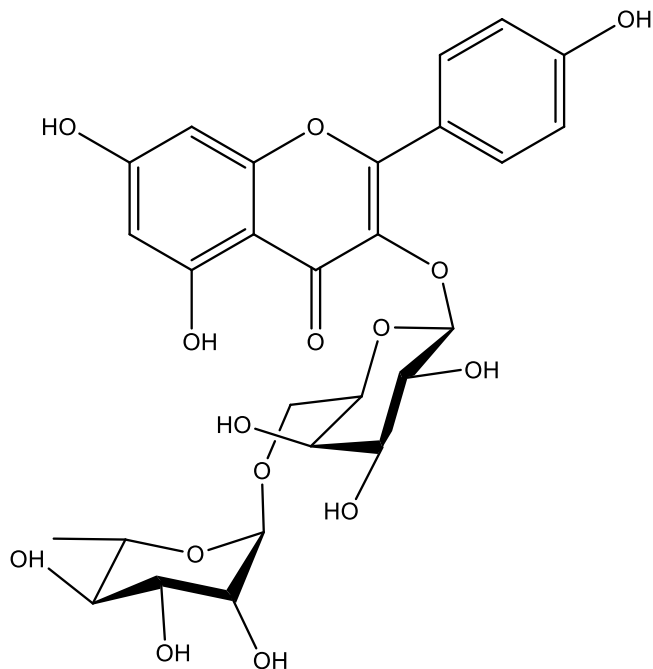

287

594.1582

617.1475

-

C<sub>27</sub>H<sub>30</sub>O<sub>15</sub>

0.56

Astragalin

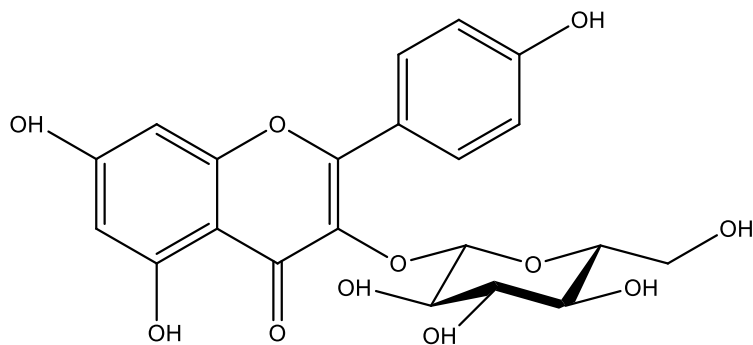

287, 165,  
153, 121

-

471.0884

-

C<sub>21</sub>H<sub>20</sub>O<sub>11</sub>

3.29

Kaempferol-3-O- $\alpha$ -L-rhamnopyranosyl(1 $\rightarrow$ 6)- $\beta$ -D-glucopyranoside

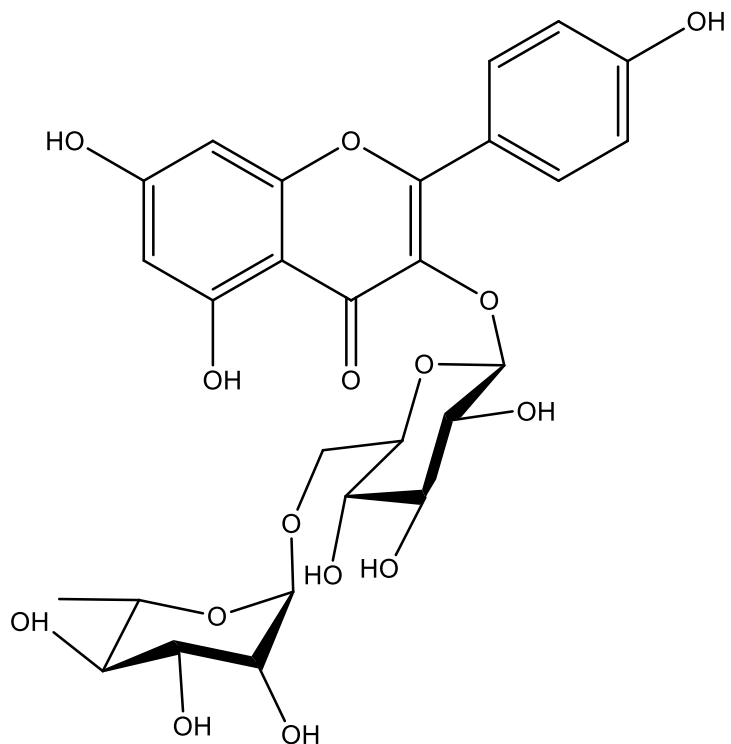

287 594.1577 617.1472 - C<sub>27</sub>H<sub>30</sub>O<sub>15</sub> 1.16

|                        |     |   |          |   |                                                 |       |
|------------------------|-----|---|----------|---|-------------------------------------------------|-------|
| Kaempferol glycoside   | 287 | - | 471.0884 | - | C <sub>21</sub> H <sub>20</sub> O <sub>11</sub> | 3.42  |
| Isorhamnetin glycoside | 317 | - | 501.0984 | - | C <sub>22</sub> H <sub>22</sub> O <sub>12</sub> | 3.76  |
| Isorhamnetin glycoside | 317 | - | 501.0989 | - | C <sub>22</sub> H <sub>22</sub> O <sub>12</sub> | 3.37  |
| Isorhamnetin glycoside | 317 | - | 617.1463 | - | C <sub>27</sub> H <sub>30</sub> O <sub>15</sub> | 3.52  |
| Isorhamnetin glycoside | 317 | - | 647.1564 | - | C <sub>28</sub> H <sub>32</sub> O <sub>16</sub> | 2.8   |
| Isorhamnetin glycoside | 317 | - | 647.1580 | - | C <sub>28</sub> H <sub>32</sub> O <sub>16</sub> | 0.27  |
| Isorhamnetin glycoside | 317 | - | 647.1592 | - | C <sub>28</sub> H <sub>32</sub> O <sub>16</sub> | -1.86 |

|                     |                                                                                    |     |          |   |   |                                                 |       |
|---------------------|------------------------------------------------------------------------------------|-----|----------|---|---|-------------------------------------------------|-------|
| Hexadecasphinganine | 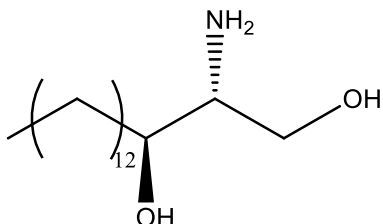 | 256 | 274.2739 | - | - | C <sub>16</sub> H <sub>35</sub> NO <sub>2</sub> | 0.65  |
| Phytosphingosine    |  | 300 | 318.3006 | - | - | C <sub>18</sub> H <sub>39</sub> NO <sub>3</sub> | -0.85 |
| Sesquiterpene       |                                                                                    | -   | 235.1690 | - | - | C <sub>15</sub> H <sub>22</sub> O <sub>2</sub>  | 1.46  |

Cavaliere, C., Cucci, F., Foglia, P., Guarino, C., Samperi, R., Laganà, A., 2007. Flavonoid profile in soybeans by high-performance liquid chromatography/tandem mass spectrometry. *Rapid Commun. Mass Spectrom.* 21, 2177–2187. <https://doi.org/10.1002/rcm.3049>

Ho, H.M., Chen, R.Y., Leung, L.K., Chan, F.L., Huang, Y., Chen, Z.Y., 2002. Difference in flavonoid and isoflavone profile between soybean and soy leaf. *Biomed. Pharmacother.* 56, 289–295. [https://doi.org/10.1016/S0753-3322\(02\)00191-9](https://doi.org/10.1016/S0753-3322(02)00191-9)

Jeon, H.Y., Seo, D.B., Shin, H.J., Lee, S.J., 2012. Effect of *Aspergillus oryzae* -challenged germination on soybean isoflavone content and antioxidant activity. *J. Agric. Food Chem.* 60, 2807–2814. <https://doi.org/10.1021/jf204708n>

Klejdus, B., Mikelová, R., Petřlová, J., Potěšil, D., Adam, V., Stiborová, M., Hodek, P., Vacek, J., Kizek, R., Kubáň, V., 2005. Evaluation of isoflavone aglycon and glycoside distribution in soy plants and soybeans by fast column high-performance liquid chromatography coupled with a diode-array detector. *J. Agric. Food Chem.* 53, 5848–5852. <https://doi.org/10.1021/jf0502754>

Salerno, G., Frati, F., Marino, G., Ederli, L., Pasqualini, S., Loreto, F., Colazza, S., Centritto, M., 2017. Effects of water stress on emission of volatile organic compounds by *Vicia faba*, and consequences for attraction of the egg parasitoid *Trissolcus basalis*. *J. Pest Sci.* (2004). 90, 635–647. <https://doi.org/10.1007/s10340-016-0830-z>

Song, H.H., Ryu, H.W., Lee, K.J., Jeong, I.Y., Kim, D.S., Oh, S.R., 2014. Metabolomics investigation of flavonoid synthesis in soybean leaves depending on the growth stage. *Metabolomics* 10, 833–841. <https://doi.org/10.1007/s11306-014-0640-3>

Zanzarin, D.M., Hernandez, C.P., Leme, L.M., Silva, E., Porto, C., Martin do Prado, R., Meyer, M.C., Favoreto, L., Nunes, E. de O., Pilau, E.J., 2019. Metabolomics of soybean green stem and foliar retention (GSFR) disease using mass spectrometry and molecular networking. *Rapid Commun. Mass Spectrom.* 1–8. <https://doi.org/10.1002/rcm.8655>

**Supplementary Table 5.** Volatile compounds detected in *Glycine max* leaves.

| Compound identification     |                                                                                      | Molecular formula                 | Main fragments                                                                   |
|-----------------------------|--------------------------------------------------------------------------------------|-----------------------------------|----------------------------------------------------------------------------------|
| Menthol (Internal Standard) | 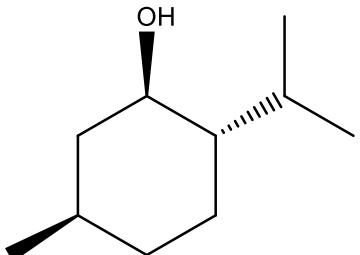   | C <sub>10</sub> H <sub>20</sub> O | 81(100), 71(95), 95(83), 91(77), 55(52), 41(47), 67(45), 82(42), 43(37), 123(34) |
| Acetaldehyde                |    | C <sub>2</sub> H <sub>4</sub> O   | 44(100), 43(53), 42(16)                                                          |
| Propanal                    |    | C <sub>3</sub> H <sub>6</sub> O   | 58(100), 57(50)                                                                  |
| 2-Propenal                  |    | C <sub>3</sub> H <sub>4</sub> O   | 56(100), 55(74)                                                                  |
| Butanal                     |   | C <sub>4</sub> H <sub>8</sub> O   | 43(100), 44(98), 41(83), 72(53), 57(33), 82(18), 53(12), 42(11), 81(10)          |
| 2-methyl-Butanal            |  | C <sub>5</sub> H <sub>10</sub> O  | 41(100), 57(89), 58(63), 43(10)                                                  |
| 3-methyl-Butanal            |  | C <sub>5</sub> H <sub>10</sub> O  | 44(100), 41(99), 43(71), 58(61), 57(28), 71(21), 42(17), 45(12)                  |

|                                      |                                                                                      |              |                                                                                                                                                         |
|--------------------------------------|--------------------------------------------------------------------------------------|--------------|---------------------------------------------------------------------------------------------------------------------------------------------------------|
| Hexanal                              | 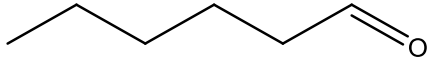   | $C_6H_{12}O$ | 44(100), 56(91), 41(72), 57(61), 43(59), 72(21), 45(20), 55(17), 82(17), 67(15), 71(10), 58(10)                                                         |
| <i>trans</i> -2-Pentenal             |    | $C_5H_8O$    | 55(100), 83(71), 41(42), 84(27), 56(26), 53(19), 69(10)                                                                                                 |
| Hex-3-enal                           |    | $C_6H_{10}O$ | 41(100), 69(31), 55(28), 70(15), 80(14), 83(11)                                                                                                         |
| Pentanal                             |    | $C_5H_{10}O$ | 44(100), 70(76), 43(74), 41(55), 55(54), 57(47)                                                                                                         |
| <i>trans</i> -Hex-2-enal             |    | $C_6H_{10}O$ | 41(100), 55(96), 69(79), 83(68), 42(62), 57(46), 70(28), 43(27), 56(23), 80(16), 97(14), 53(14), 54(11), 40(10), 79(10)                                 |
| Octanal                              |    | $C_8H_{16}O$ | 41(100), 57(97), 43(91), 44(75), 55(74), 56(68), 84(61), 82(47), 69(46), 42(43),                                                                        |
| Nonanal                              |  | $C_9H_{18}O$ | 57(100), 41(83), 56(74), 55(59), 43(53), 70(45), 44(36), 95(35), 68(34), 67(33), 81(32), 69(29), 82(27), 98(23), 45(19), 42(17), 71(15), 96(14), 83(11) |
| <i>trans,trans</i> -Hexa-2,4-dienal  |  | $C_6H_8O$    | 81(100), 53(34), 41(34), 96(28), 67(25), 82(20)                                                                                                         |
| <i>trans,trans</i> -Hepta-2,4-dienal |  | $C_7H_{10}O$ | 81(100), 53(19), 41(16), 79(13), 110(13), 67(11)                                                                                                        |



|                            |                                                                                      |                 |                                                                                                                                                                  |
|----------------------------|--------------------------------------------------------------------------------------|-----------------|------------------------------------------------------------------------------------------------------------------------------------------------------------------|
| Heptadecanal               | 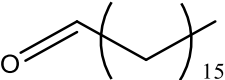   | $C_{17}H_{34}O$ | 43(100), 57(85), 55(78), 82(78), 41(70), 67(54), 81(51), 83(50), 96(46), 68(46), 71(44), 95(40), 69(36), 85(31), 70(30), 97(25), 56(23), 110(18), 84(18), 44(18) |
| 1-Penten-3-ol              |    | $C_5H_{10}O$    | 57(100), 41(6), 43(6)                                                                                                                                            |
| 1-pentanol                 |    | $C_5H_{12}O$    | 42(100), 55(89), 41(59), 70(36)                                                                                                                                  |
| <i>cis</i> -2-Penten-1-ol  |    | $C_5H_{10}O$    | 57(100), 44(22), 41(21), 43(18), 68(16), 67(15), 55(13), 53(10)                                                                                                  |
| 1-Hexanol                  |    | $C_6H_{14}O$    | 56(100), 43(59), 55(49), 41(43), 42(37), 69(35)                                                                                                                  |
| <i>trans</i> -3-Hexenol    |    | $C_6H_{12}O$    | 41(100), 67(91), 55(44), 82(42), 69(28), 42(23), 53(16), 57(14), 54(12)                                                                                          |
| <i>trans</i> -2-Hexen-1-ol |  | $C_6H_{12}O$    | 57(100), 41(57), 67(23), 82(21), 43(16), 44(14), 56(13), 55(12), 71(11)                                                                                          |
| 1-Octen-3-ol               |  | $C_8H_{16}O$    | 57(100), 43(22), 72(13), 41(12), 55(11)                                                                                                                          |
| 1-Octanol                  |  | $C_8H_{18}O$    | 56(100), 55(82), 41(54), 42(53), 57(44), 70(41), 69(36), 84(35), 43(29), 83(20), 59(16), 85(13),                                                                 |

3,4-Dimethylcyclohexanol

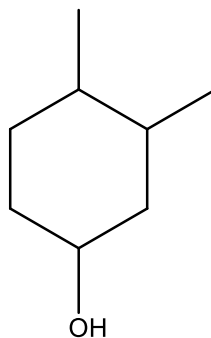 $C_8H_{16}O$ 

71(100), 43(71), 95(70), 57(33), 58(30), 41(24), 110(21), 85(18)

3,5,5-Trimethyl-hex-2-ene

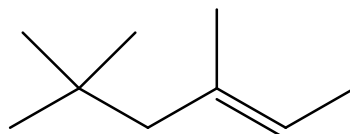 $C_9H_{18}$ 

100(57), 38(70), 55(32), 41(27), 69(17), 42(10), 109(10)

2-Ethylfuran

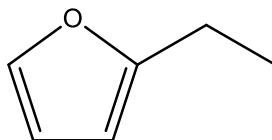 $C_6H_8O$ 

81(100), 96(41), 53(31),

2-pentyl-Furan

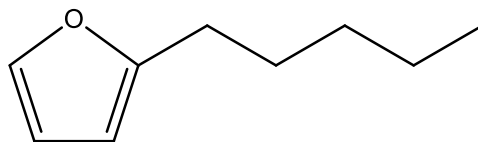 $C_9H_{14}O$ 

81(100), 82(24), 138(20), 53(13)

Furfural

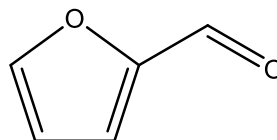 $C_5H_4O_2$ 

95(100), 96(99), 67(13)

2-Butanone

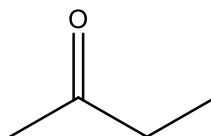 $C_4H_8O$ 

43(100), 72(31), 57(12)

---

3-methyl-2-Butanone

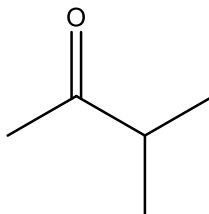

$C_5H_{10}O$  43(100), 86(21), 41(19), 44(12), 49(11)

---

2,3-Butanedione

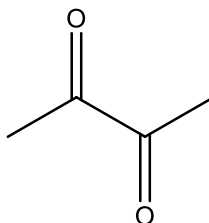

$C_4H_6O_2$  43(100), 86(20)

---

2,3-Pentanedione

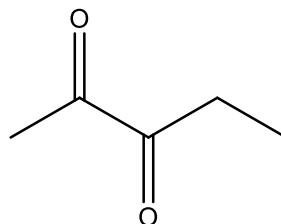

$C_5H_8O_2$  43(100), 57(58), 100(18)

---

3-Octanone

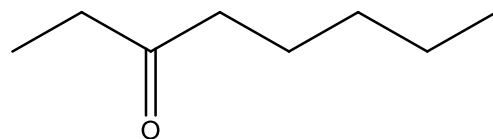

$C_8H_{16}O$  43(100), 57(71), 71(53), 99(47), 71(37), 41(24),  
55(18), 68(11), 56(10)

---

Acetoin

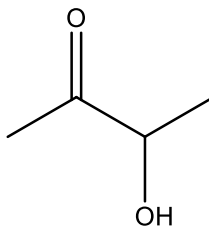

$C_4H_8O_2$  45(100), 43(60), 88(10)

---

|                                              |                                                                                      |                 |                                                                                                                                  |
|----------------------------------------------|--------------------------------------------------------------------------------------|-----------------|----------------------------------------------------------------------------------------------------------------------------------|
| D-Limonene                                   | 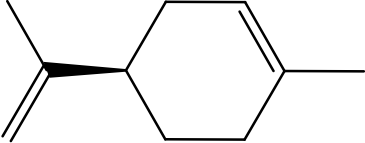   | $C_{10}H_{16}$  | 68(100), 67(99), 93(95), 94(44), 79(39), 92(32), 91(30), 121(27), 107(25), 53(23), 77(20), 41(17), 80(15), 136(12), 81(11)       |
| $\beta$ -Cymene                              |    | $C_{10}H_{14}$  | 119(100), 91(30), 134(28), 94(25), 117(21), 66(11), 115(11)                                                                      |
| Acetol                                       |    | $C_3H_6O_2$     | 43(100), 74(9)                                                                                                                   |
| Benzaldehyde                                 |    | $C_7H_6O$       | 105(100), 106(97), 77(93), 51(44), 50(23), 78(13)                                                                                |
| Linalool                                     |   | $C_{10}H_{18}O$ | 71(100), 93(73), 43(51), 41(47), 55(47), 69(37), 80(34), 121(19), 92(19), 91(15), 81(14), 67(13), 83(13), 79(12), 53(12), 41(10) |
| 1,3,4-trimethyl-Cyclohexene-1-carboxaldehyde |  | $C_{10}H_{16}O$ | 81(100), 109(81), 137(74), 123(74), 91(69), 152(64), 95(48), 41(47)                                                              |
| Benzeneacetaldehyde                          |  | $C_8H_8O$       | 91(100), 92(30), 65(20), 120(15)                                                                                                 |

Methyl salicylate

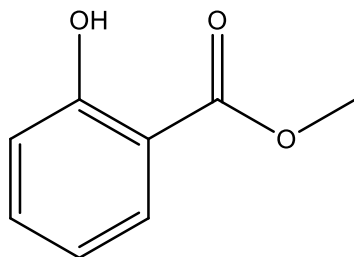

$C_8H_8O_3$  120(100), 92(76), 152(58), 121(32), 65(21), 93(21)

6,10-Dimethyl-5,9-undecadien-2-one

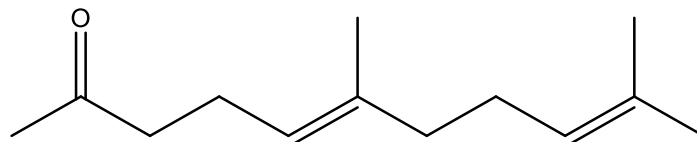

$C_{13}H_{22}O$  43(100), 69(41), 41(32), 107(18), 136(17)

 $\beta$ -Ionone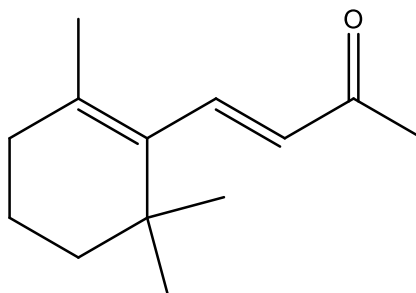

$C_{13}H_{20}O$  177(100), 43(39), 91(16), 44(14), 133(12), 107(11), 105(10)

4-Vinylguaiacol

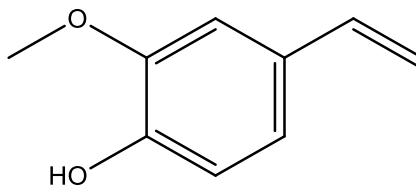

$C_9H_{10}O_2$  150(100), 135(97), 107(52), 77(45), 79(29), 151(15), 78(11)

Phytol

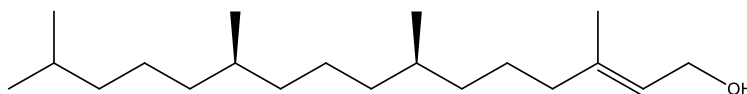

$C_{20}H_{40}O$  71(100), 45(36), 57(36), 43(30), 81(27), 55(27), 69(23), 41(21), 123(19), 68(17), 70(17)



**Supplementary Figure 6.** Leaf consumption ( $\text{cm}^2$ ) in *Glycine max* leaves of ten cultivars in an *in vivo* bioassay. The data are based on ten replicas. Standard errors are displayed.

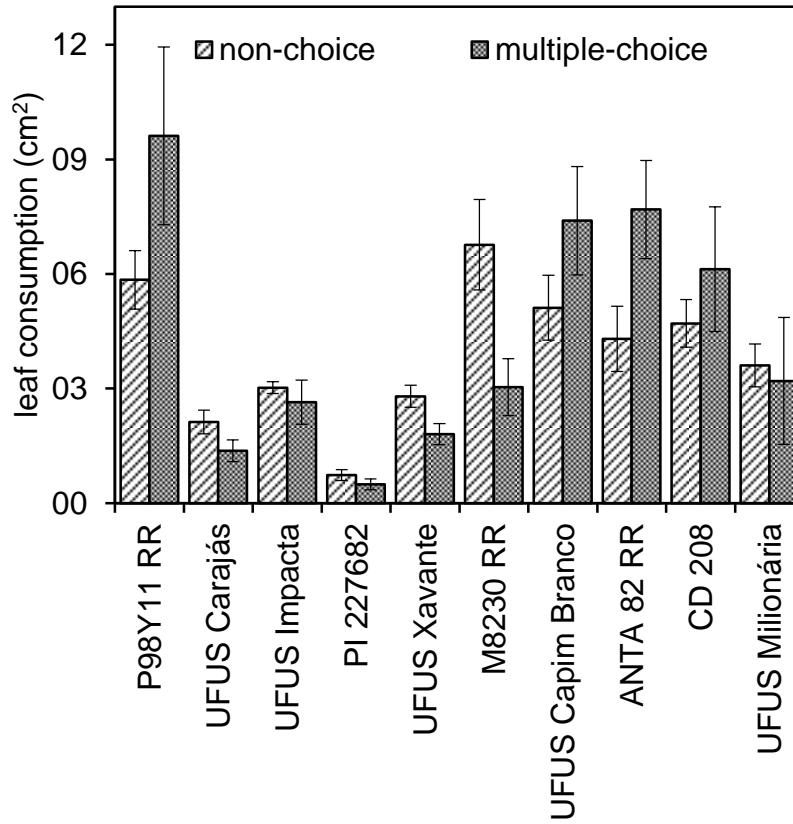

Supplement: Data_Sheet_1.pdf [file Data_Sheet_1.pdf]
